# Supplementary material
Source: PubMed Central journal article supplement (PMC3491620)
Supplement: Supp_Fig1.pdf [file Supp_Fig1.pdf]

## Supplementary Data

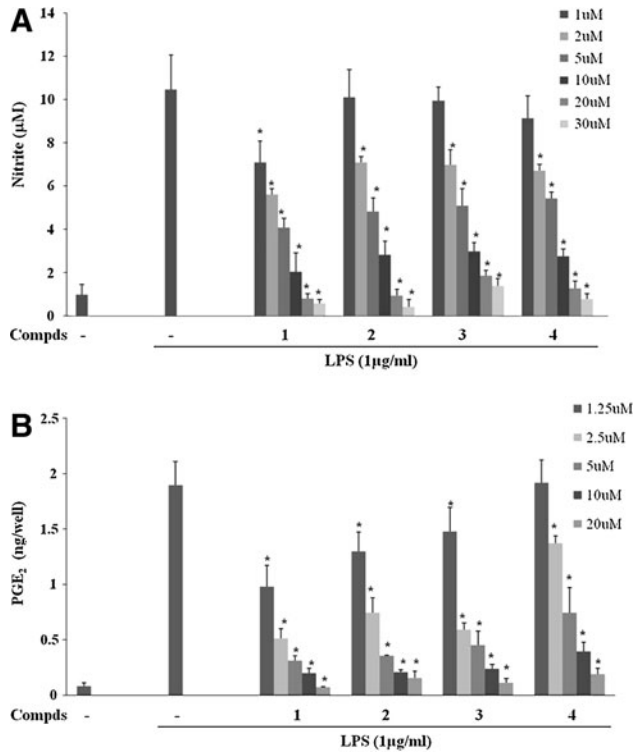

**FIG. S1.** Effects of sulfur compounds **1–4** from garlic on LPS-induced nitrite and PGE<sub>2</sub> production in RAW 264.7 cells. **(A)** The amount of nitrite in culture medium was measured by using the Griess reagents. **(B)** PGE<sub>2</sub> concentrations were quantified in the culture supernatant by enzyme immunoassay. Data are mean ± SD values of three individual experiments. \**P* < .01, significant difference from LPS alone.
