# Supplementary material
Source: PubMed Central journal article supplement (PMC3491620)
Supplement: Supp_Fig2.pdf [file Supp_Fig2.pdf]

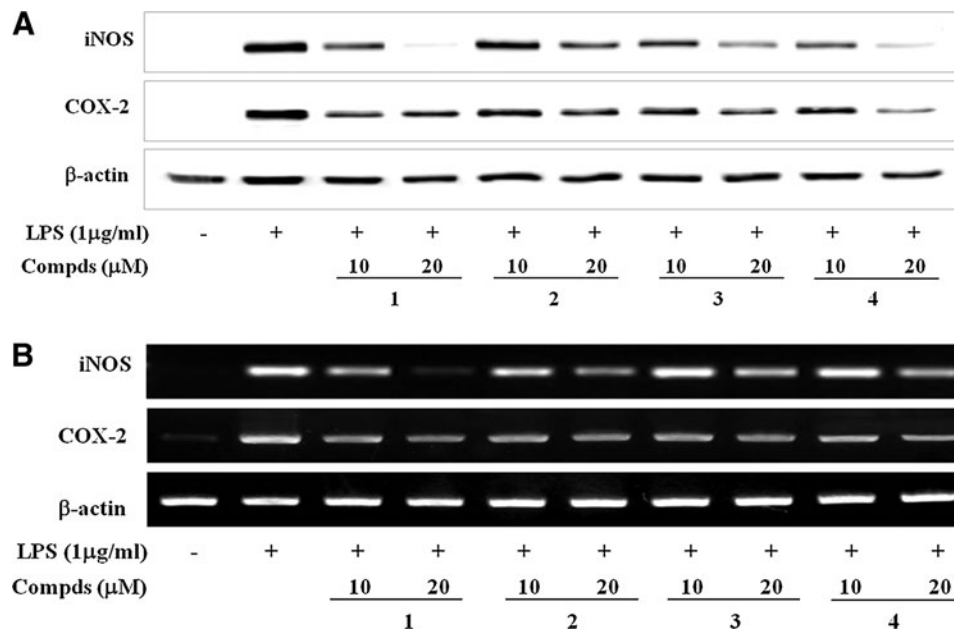

**FIG. S2.** Effect of sulfur compounds (comps) 1–4 from garlic on LPS-induced iNOS and COX-2 protein and mRNA expression in RAW 264.7 macrophages. **(A)** RAW 264.7 macrophages were treated with LPS (1  $\mu$ g/mL) in the presence or absence of sulfur comps for 20 h. Whole-cell lysates were subjected to sodium dodecyl sulfate–polyacrylamide gel electrophoresis, and the protein levels of iNOS and COX-2 were determined by western blot analysis. **(B)** The mRNA levels of iNOS and COX-2 were examined by reverse transcription–polymerase chain reaction. RAW 264.7 macrophages were treated with LPS (1  $\mu$ g/mL) in the presence or absence of sulfur comps for 8 h. Images are representative of three independent experiments that gave similar results.
