# Supplementary material
Source: PubMed Central journal article supplement (PMC3491620)
Supplement: Supp_Fig3.pdf [file Supp_Fig3.pdf]

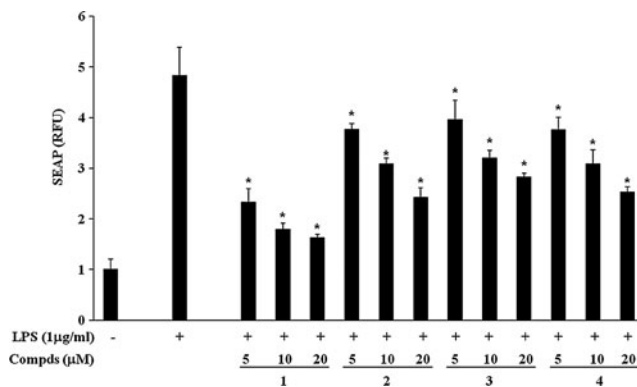

**FIG. S3.** Effect of sulfur compds 1–4 from garlic on LPS-induced NF- $\kappa$ B transcriptional activation in stably transfected RAW 264.7 cells with pNF- $\kappa$ B-SEAP-NPT (T-RAW 264.7 cells). Cells were pretreated with sulfur compds for 2 h prior to LPS stimulation (1  $\mu$ g/mL) for 16 h. Aliquots of medium was analyzed for the measurement of alkaline phosphatase activity as described in Materials and Methods. Data are mean  $\pm$  SD values of three individual experiments. \* $P$  < .01, significant difference from LPS alone. RFU, relative fluorescence units.
